# Supplementary material
Source: PubMed Central journal article supplement (PMC6779436)
Supplement: supp_RA119.010063_154111_1_supp_376077_pvz0n5.pdf [file supp_RA119.010063_154111_1_supp_376077_pvz0n5.pdf]

Systematic analysis of F-box proteins reveals  
a new branch of the yeast mating pathway

**Nambirajan Rangarajan**<sup>1, \*\*</sup>, **Claire L. Gordy**<sup>1, \*\*</sup>, **Lauren Askew**<sup>1</sup>, **Samantha M. Bevill**<sup>1</sup>,  
**Timothy C. Elston**<sup>1</sup>, **Beverly Errede**<sup>2</sup>, **Jillian H. Hurst**<sup>1</sup>, **Joshua B. Kelley**<sup>1</sup>, **Joshua B. Sheetz**<sup>1, #</sup>,  
**Sara Kimiko Suzuki**<sup>1, 3</sup>, **Natalie H. Valentin**<sup>1</sup>, **Everett Young**<sup>1, #</sup>, and **Henrik G. Dohlman**<sup>1, \*</sup>

<sup>1</sup> Department of Pharmacology, University of North Carolina at Chapel Hill, 120 Mason Farm Road, 4016 Genetic Medicine Building, Campus Box 7365, Chapel Hill, N.C. 27599, U.S.A.

<sup>2</sup> Department of Biochemistry and Biophysics, University of North Carolina at Chapel Hill, 120 Mason Farm Road, 3046 Genetic Medicine Building, Campus Box 7260, Chapel Hill, N.C. 27599, U.S.A.

<sup>3</sup> Curriculum in Bioinformatics and Computational Biology, University of North Carolina at Chapel Hill, 120 Mason Farm Road, 4092 Genetic Medicine Building, Campus Box 7365, Chapel Hill, N.C. 27599, U.S.A.

\*\* Equal contributor

# Undergraduate researcher

\* **To whom correspondence should be addressed:** Henrik G. Dohlman, University of North Carolina at Chapel Hill, 4016 Genetic Medicine Building, 120 Mason Farm Rd., Chapel Hill, NC 27599 USA. Telephone: 919-843-6894; E-mail: [hdohlman@med.unc.edu](mailto:hdohlman@med.unc.edu)

## TABLE OF CONTENTS

**Figure S1:** Pheromone-induced vacuolar targeting requires the regulatory kinase Vps15.

**Figure S2:** Pheromone-induced vacuolar targeting requires the phosphorylation sites on the MAP kinase Fus3.

**Figure S3:** Dia2 limits abundance of organelle marker proteins under basal conditions.

**Table S1:** Yeast strains used in this study.

**Movie S1:** Live cell imaging of the polarity marker Bem1-GFP in wild-type BY4741 cells treated with 300 nM  $\alpha$ -factor. Bem1-GFP fluorescence in the daughter cell on top was used for kymograph analysis in Figure 5B.

## FIGURE S1

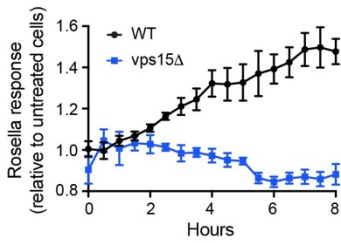

**Fig. S1: Pheromone-induced vacuolar targeting requires the regulatory kinase Vps15.** Time course of Rosella response upon treatment with by 1  $\mu$ M  $\alpha$ -factor in BY4741 *bar1* $\Delta$  cells lacking Vps15, the regulatory subunit of the PI 3-kinase complex. Related to Figure 2A.

## FIGURE S2

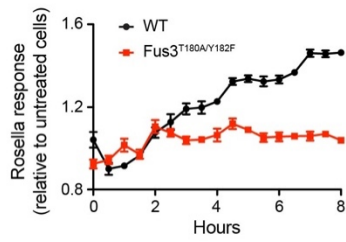

**Fig. S2: Pheromone-induced vacuolar targeting requires the phosphorylation sites on the MAP kinase Fus3.** Time course of Rosella response upon treatment with 1  $\mu$ M  $\alpha$ -factor in BY4741 *bar1* $\Delta$  cells expressing a non-phosphorylatable form of the MAPK (Fus3<sup>T180AY182F</sup>). Related to Figure 2C.

**FIGURE S3**

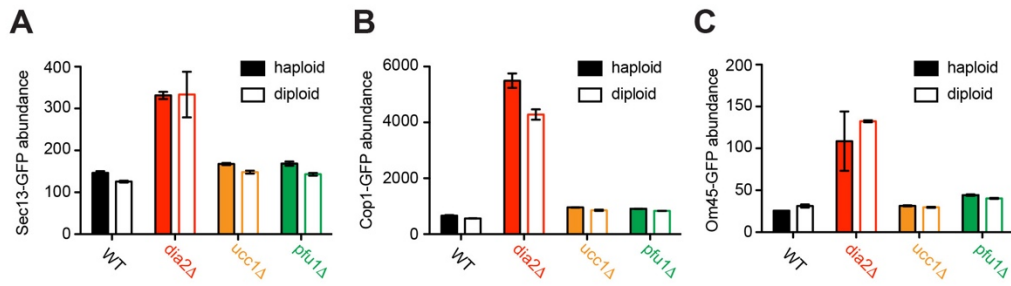

**Fig. S3: Dia2 limits abundance of organelle marker proteins under basal conditions.** Flow cytometry analysis of the abundance of organelle marker proteins in haploid and diploid BY4741 (“WT”), *dia2Δ*, *ucc1Δ* and *pfu1Δ* cells. Abundance is reported by fluorescence of GFP fused with (A) Sec13 (endoplasmic reticulum-to-Golgi transport vesicles), (B) Cop1 (early Golgi), or (C) Om45 (mitochondria). Flow cytometry data are  $\pm$  standard deviation for four biological replicates (10,000 cells each).

**TABLE S1**

Yeast strains used in this study.

| <b>Strain</b>                                             | <b>Description</b>                                                                                                                  | <b>Source</b>                          |
|-----------------------------------------------------------|-------------------------------------------------------------------------------------------------------------------------------------|----------------------------------------|
| <i>BY4741</i>                                             | <i>MAT<math>\alpha</math> his3<math>\Delta</math> leu2<math>\Delta</math> met15<math>\Delta</math> ura3<math>\Delta</math> LYS2</i> | Yeast Knockout Collection (Invitrogen) |
| <i>BY4742</i>                                             | <i>MAT<math>\alpha</math> his3<math>\Delta</math> leu2<math>\Delta</math> lys2<math>\Delta</math> ura3<math>\Delta</math> MET15</i> | Invitrogen                             |
| <i>bar1<math>\Delta</math></i>                            | <i>BY4741 bar1<math>\Delta</math>::KanMX</i>                                                                                        | Slessareva et al 2006                  |
| <i>pho8<math>\Delta</math>60</i>                          | <i>BY4741 pho8<math>\Delta</math>::pho8<math>\Delta</math>60::KanMX</i>                                                             | This study                             |
| <i>vps34<math>\Delta</math> bar1<math>\Delta</math></i>   | <i>BY4741 vps34<math>\Delta</math>::KanMX bar1<math>\Delta</math>::HIS3MX6</i>                                                      | This study                             |
| <i>atg14<math>\Delta</math> bar1<math>\Delta</math></i>   | <i>BY4741 atg14<math>\Delta</math>::KanMX bar1<math>\Delta</math>::HIS3MX6</i>                                                      | This study                             |
| <i>vps38<math>\Delta</math> bar1<math>\Delta</math></i>   | <i>BY4741 vps38<math>\Delta</math>::HIS3MX6 bar1<math>\Delta</math>::KanMX</i>                                                      | This study                             |
| <i>kss1<math>\Delta</math> bar1<math>\Delta</math></i>    | <i>BY4741 kss1<math>\Delta</math>::KanMX bar1<math>\Delta</math>::HIS3MX6</i>                                                       | This study                             |
| <i>fus3<math>\Delta</math> bar1<math>\Delta</math></i>    | <i>BY4741 fus3<math>\Delta</math>::KanMX bar1<math>\Delta</math>::HIS3MX6</i>                                                       | This study                             |
| <i>Chc1-GFP vps34<math>\Delta</math></i>                  | <i>BY4741 Chc1-GFP::HIS3MX6 vps34<math>\Delta</math>::HYGRO</i>                                                                     | This study                             |
| <i>Cop1-GFP vps34<math>\Delta</math></i>                  | <i>BY4741 Cop1-GFP::HIS3MX6 vps34<math>\Delta</math>::HYGRO</i>                                                                     | This study                             |
| <i>Sec13-GFP vps34<math>\Delta</math></i>                 | <i>BY4741 Sec13-GFP::HIS3MX6 vps34<math>\Delta</math>::HYGRO</i>                                                                    | This study                             |
| <i>Sac6-GFP vps34<math>\Delta</math></i>                  | <i>BY4741 Sac6-GFP::HIS3MX6 vps34<math>\Delta</math>::HYGRO</i>                                                                     | This study                             |
| <i>Chc1-RFP vps34<math>\Delta</math></i>                  | <i>BY4742 Chc1-RFP::KanMX vps34<math>\Delta</math>::HYGRO</i>                                                                       | This study                             |
| <i>Cop1-RFP vps34<math>\Delta</math></i>                  | <i>BY4742 Cop1-RFP::KanMX vps34<math>\Delta</math>::HYGRO</i>                                                                       | This study                             |
| <i>Sec13-RFP vps34<math>\Delta</math></i>                 | <i>BY4742 Sec13-RFP::KanMX vps34<math>\Delta</math>::HYGRO</i>                                                                      | This study                             |
| <i>Sac6-RFP vps34<math>\Delta</math></i>                  | <i>BY4742 Sac6-RFP::KanMX vps34<math>\Delta</math>::HYGRO</i>                                                                       | This study                             |
| <i>dia2<math>\Delta</math> bar1<math>\Delta</math></i>    | <i>BY4741 dia2<math>\Delta</math>::KanMX bar1<math>\Delta</math>::HIS3MX6</i>                                                       | This study                             |
| <i>das1<math>\Delta</math> bar1<math>\Delta</math></i>    | <i>BY4741 das1<math>\Delta</math>::KanMX bar1<math>\Delta</math>::HIS3MX6</i>                                                       | This study                             |
| <i>ufo1<math>\Delta</math> bar1<math>\Delta</math></i>    | <i>BY4741 ufo1<math>\Delta</math>::KanMX bar1<math>\Delta</math>::HIS3MX6</i>                                                       | This study                             |
| <i>pfu1<math>\Delta</math> bar1<math>\Delta</math></i>    | <i>BY4741 ydr306c<math>\Delta</math>::KanMX bar1<math>\Delta</math>::HIS3MX6</i>                                                    | This study                             |
| <i>hrt3<math>\Delta</math> bar1<math>\Delta</math></i>    | <i>BY4741 hrt3<math>\Delta</math>::KanMX bar1<math>\Delta</math>::HIS3MX6</i>                                                       | This study                             |
| <i>mfb1<math>\Delta</math> bar1<math>\Delta</math></i>    | <i>BY4741 mfb1<math>\Delta</math>::KanMX bar1<math>\Delta</math>::HIS3MX6</i>                                                       | This study                             |
| <i>ucc1<math>\Delta</math> bar1<math>\Delta</math></i>    | <i>BY4741 ucc1<math>\Delta</math>::KanMX bar1<math>\Delta</math>::HIS3MX6</i>                                                       | This study                             |
| <i>ylr352w<math>\Delta</math> bar1<math>\Delta</math></i> | <i>BY4741 ylr352w3<math>\Delta</math>::KanMX bar1<math>\Delta</math>::HIS3MX6</i>                                                   | This study                             |
| <i>saf1<math>\Delta</math> bar1<math>\Delta</math></i>    | <i>BY4741 saf1<math>\Delta</math>::KanMX bar1<math>\Delta</math>::HIS3MX6</i>                                                       | This study                             |
| <i>ydr131c<math>\Delta</math> bar1<math>\Delta</math></i> | <i>BY4741 ydr131c<math>\Delta</math>::KanMX bar1<math>\Delta</math>::HIS3MX6</i>                                                    | This study                             |
| <i>ynl311c<math>\Delta</math> bar1<math>\Delta</math></i> | <i>BY4741 ynl311c<math>\Delta</math>::KanMX bar1<math>\Delta</math>::HIS3MX6</i>                                                    | This study                             |
| <i>ymr258c<math>\Delta</math> bar1<math>\Delta</math></i> | <i>BY4741 ymr258c<math>\Delta</math>::KanMX bar1<math>\Delta</math>::HIS3MX6</i>                                                    | This study                             |
| <i>mdm30<math>\Delta</math> bar1<math>\Delta</math></i>   | <i>BY4741 mdm30<math>\Delta</math>::KanMX bar1<math>\Delta</math>::HIS3MX6</i>                                                      | This study                             |
| <i>grr1<math>\Delta</math> bar1<math>\Delta</math></i>    | <i>BY4741 grr1<math>\Delta</math>::KanMX bar1<math>\Delta</math>::HIS3MX6</i>                                                       | This study                             |
| <i>Chc1-GFP dia2<math>\Delta</math></i>                   | <i>BY4741 Chc1-GFP::HIS3MX6 dia2<math>\Delta</math>::HYGRO</i>                                                                      | This study                             |
| <i>Cop1-GFP dia2<math>\Delta</math></i>                   | <i>BY4741 Cop1-GFP::HIS3MX6 dia2<math>\Delta</math>::HYGRO</i>                                                                      | This study                             |
| <i>Sec13-GFP dia2<math>\Delta</math></i>                  | <i>BY4741 Sec13-GFP::HIS3MX6 dia2<math>\Delta</math>::HYGRO</i>                                                                     | This study                             |
| <i>Sac6-GFP dia2<math>\Delta</math></i>                   | <i>BY4741 Sac6-GFP::HIS3MX6 dia2<math>\Delta</math>::HYGRO</i>                                                                      | This study                             |
| <i>Chc1-RFP dia2<math>\Delta</math></i>                   | <i>BY4742 Chc1-RFP::KanMX dia2<math>\Delta</math>::HYGRO</i>                                                                        | This study                             |
| <i>Cop1-RFP dia2<math>\Delta</math></i>                   | <i>BY4742 Cop1-RFP::KanMX dia2<math>\Delta</math>::HYGRO</i>                                                                        | This study                             |
| <i>Sec13-RFP dia2<math>\Delta</math></i>                  | <i>BY4742 Sec13-RFP::KanMX dia2<math>\Delta</math>::HYGRO</i>                                                                       | This study                             |
| <i>Sac6-RFP dia2<math>\Delta</math></i>                   | <i>BY4742 Sac6-RFP::KanMX dia2<math>\Delta</math>::HYGRO</i>                                                                        | This study                             |

|                        |                                                       |                                           |
|------------------------|-------------------------------------------------------|-------------------------------------------|
| <i>dia2Δ</i>           | <i>BY4741 dia2Δ::KanMX</i>                            | Yeast Knockout Collection<br>(Invitrogen) |
| <i>ucc1Δ</i>           | <i>BY4741 ucc1Δ::KanMX</i>                            | Invitrogen                                |
| <i>hrt3Δ</i>           | <i>BY4741 hrt3Δ::KanMX</i>                            | Invitrogen                                |
| <i>das1Δ</i>           | <i>BY4741 das1Δ::KanMX</i>                            | Invitrogen                                |
| <i>mfb1Δ</i>           | <i>BY4741 mfb1Δ::KanMX</i>                            | Invitrogen                                |
| <i>ylr352wΔ</i>        | <i>BY4741 ylr352wΔ::KanMX</i>                         | Invitrogen                                |
| <i>ydr131cΔ</i>        | <i>BY4741 ydr131cΔ::KanMX</i>                         | Invitrogen                                |
| <i>ynl311cΔ</i>        | <i>BY4741 ynl311cΔ::KanMX</i>                         | Invitrogen                                |
| <i>ufo1Δ</i>           | <i>BY4741 ufo1Δ::KanMX</i>                            | Invitrogen                                |
| <i>pfu1Δ</i>           | <i>BY4741 ydr306cΔ::KanMX</i>                         | Invitrogen                                |
| <i>saf1Δ</i>           | <i>BY4741 saf1Δ::KanMX</i>                            | Invitrogen                                |
| <i>ymr258cΔ</i>        | <i>BY4741 ymr258cΔ::KanMX</i>                         | Invitrogen                                |
| <i>mdm30Δ</i>          | <i>BY4741 mdm30Δ::KanMX</i>                           | Invitrogen                                |
| <i>grr1Δ</i>           | <i>BY4741 grr1Δ:URA</i>                               | This study                                |
| <i>Chc1-GFP ucc1Δ</i>  | <i>BY4741 Chc1-GFP::HIS3MX6 ucc1Δ::HYGRO</i>          | This study                                |
| <i>Cop1-GFP ucc1Δ</i>  | <i>BY4741 Cop1-GFP::HIS3MX6 ucc1Δ::HYGRO</i>          | This study                                |
| <i>Sec13-GFP ucc1Δ</i> | <i>BY4741 Sec13-GFP::HIS3MX6 ucc1Δ::HYGRO</i>         | This study                                |
| <i>Sac6-GFP ucc1Δ</i>  | <i>BY4741 Sac6-GFP::HIS3MX6 ucc1Δ::HYGRO</i>          | This study                                |
| <i>Chc1-RFP ucc1Δ</i>  | <i>BY4742 Chc1-RFP::KanMX ucc1Δ::HYGRO</i>            | This study                                |
| <i>Cop1-RFP ucc1Δ</i>  | <i>BY4742 Cop1-RFP::KanMX ucc1Δ::HYGRO</i>            | This study                                |
| <i>Sec13-RFP ucc1Δ</i> | <i>BY4742 Sec13-RFP::KanMX ucc1Δ::HYGRO</i>           | This study                                |
| <i>Sac6-RFP ucc1Δ</i>  | <i>BY4742 Sac6-RFP::KanMX ucc1Δ::HYGRO</i>            | This study                                |
| <i>Chc1-GFP pfu1Δ</i>  | <i>BY4741 Chc1-GFP::HIS3MX6 ydr306cΔ::HYGRO</i>       | This study                                |
| <i>Cop1-GFP pfu1Δ</i>  | <i>BY4741 Cop1-GFP::HIS3MX6 ydr306c<br/>Δ::HYGRO</i>  | This study                                |
| <i>Sec13-GFP pfu1Δ</i> | <i>BY4741 Sec13-GFP::HIS3MX6 ydr306c<br/>Δ::HYGRO</i> | This study                                |
| <i>Sac6-GFP pfu1Δ</i>  | <i>BY4741 Sac6-GFP::HIS3MX6 ydr306c Δ::HYGRO</i>      | This study                                |
| <i>Chc1-RFP pfu1Δ</i>  | <i>BY4742 Chc1-RFP::KanMX ydr306c Δ::HYGRO</i>        | This study                                |
| <i>Cop1-RFP pfu1Δ</i>  | <i>BY4742 Cop1-RFP::KanMX ydr306c Δ::HYGRO</i>        | This study                                |
| <i>Sec13-RFP pfu1Δ</i> | <i>BY4742 Sec13-RFP::KanMX ydr306c Δ::HYGRO</i>       | This study                                |
| <i>Sac6-RFP pfu1Δ</i>  | <i>BY4742 Sac6-RFP::KanMX ydr306c Δ::HYGRO</i>        | This study                                |
| <i>Bem1-GFP</i>        | <i>BY4741 Bem1-GFP::His3MX6</i>                       | This study                                |
| <i>Bem1-GFP pfu1Δ</i>  | <i>BY4741 Bem1-GFP::His3MX6 ydr306c Δ::KanMX</i>      | This study                                |
| <i>Om45-GFP</i>        | <i>BY4741 Om45-GFP::His3MX6</i>                       | GFP library                               |
| <i>Om45-GFP dia2Δ</i>  | <i>BY4741 Om45-GFP::His3MX6 dia2Δ::HYGRO</i>          | This study                                |
| <i>Om45-GFP pfu1Δ</i>  | <i>BY4741 Om45-GFP::His3MX6 pfu1Δ::HYGRO</i>          | This study                                |
| <i>Om45-GFP ucc1Δ</i>  | <i>BY4741 Om45-GFP::His3MX6 ucc1Δ::HYGRO</i>          | This study                                |
